# Supplementary material
Source: HighWire-hosted journal article supplement (https://bmjopen.bmj.com/content/9/2/e027006)
Supplement: inline-supplementary-material-1 [file inline-supplementary-material-1.pdf]

## Framework for visual content analysis

| Category                       | Examples                                                                                                                                                    |
|--------------------------------|-------------------------------------------------------------------------------------------------------------------------------------------------------------|
| Type of image                  | Photograph, drawing, textual, mixed text and photograph, collage                                                                                            |
| Main subject                   | Self, unidentified person, objects, celebrity or recognizable fictional character, landscape, building, other                                               |
| Gender (if person shown)       | Male, female, mixed, ambiguous, unidentified                                                                                                                |
| Textual image                  | Emotional tone positive or negative, ambiguous or mixed                                                                                                     |
| Self-harm representation       | Yes/No                                                                                                                                                      |
| Method of self-harm referenced | Cutting, burning, alcohol, drugs, eating disorder, poisoning, mixed methods, N/A                                                                            |
| Severity of injury             | Superficial/moderate/severe, healed scars only, bandages, N/A                                                                                               |
| Body part if shown             | Arm, leg, torso etc                                                                                                                                         |
| Stated purpose                 | Inform others, reach out, share recovery, inspire, explain reasons, share feelings, illustrate weight loss/thinness, share joke, respond to others, unclear |
| Stated emotion                 | Anger sadness, hope, fear, pride, happiness, unclear                                                                                                        |
