# Supplementary material
Source: HighWire-hosted journal article supplement (https://bmjopen.bmj.com/content/9/2/e027006)
Supplement: inline-supplementary-material-2 [file inline-supplementary-material-2.pdf]

## A tool for the interpretations of journalistic photographs

| Characteristic                      | Examples and description                                                                                                                                                                                                                                                                                           |
|-------------------------------------|--------------------------------------------------------------------------------------------------------------------------------------------------------------------------------------------------------------------------------------------------------------------------------------------------------------------|
| Photo-content                       | Name, if possible, and describe the place and character(s) in the photograph, their appearance, dress, facial expression, sex, age, relationship, social status, nationality, religion, culture, and so on. What are the characters doing/were doing? What feelings their faces, behaviour, or appearance express? |
| Caption                             | Now read the caption to this photograph. What is your interpretation of this photograph now? Does the caption add new information for you?                                                                                                                                                                         |
| Photo-techniques                    | Describe the background in which the characters are displayed, colours, shading, light, its type (natural/artificial) and source (sunlight, candle light, lamp etc.). What can you see in the foreground, and in the background, which elements are centred? What is the atmosphere of this photograph?            |
| Emotions / feelings                 | What kinds of emotions and feelings this photograph raises in you? Describe them.                                                                                                                                                                                                                                  |
| Function                            | Is there anything in the photograph that catches your attention? Explain.                                                                                                                                                                                                                                          |
| Symbol and visual rhetorical figure | Are there any elements in the photograph which seem to symbolize something?<br>Explain.<br>Can you name and describe any visual rhetorical figures in the photograph?                                                                                                                                              |
| Intertextuality                     | Look one more time at the photograph. Does it remind you of some other images, art, film, other cultural artefacts, religious beliefs, or your own experiences? Please describe.                                                                                                                                   |
| Photo-message                       | What message does this photograph carry? Is there any message?                                                                                                                                                                                                                                                     |
